# Supplementary material for: Macavirus latency-associated protein evades immune detection through regulation of protein synthesis in cis depending upon its glycin/glutamate-rich domain
Source: PubMed Central journal article supplement (PMC5695634; doi:10.1371/journal.ppat.1006691), 2017-10-23
Supplement: ppat.1006691.s008.pdf [file ppat.1006691.s008.pdf]

**S1 Table.** Oligonucleotides used in this study to produce aLANA and aLANA mutant expression plasmids

| Construction                                          | Primer                                     | Sequence                                                                                              | Strategy      |
|-------------------------------------------------------|--------------------------------------------|-------------------------------------------------------------------------------------------------------|---------------|
| SIIN                                                  | <i>KpnI/BamHI</i> -SIIN-Fwd                | 5'- <b>ggtacc</b> agcataattaatttcgaaaagctctaagcggccg <b>ggatcc</b> -3'                                | Ligation      |
|                                                       | <i>KpnI/BamHI</i> -SIIN-Rev                | 5'- <b>ggatccc</b> gcgccgcttagagcttttcgaaattaattatgct <b>ggatcc</b> -3'                               |               |
| aLANA-SIIN                                            | <i>HindIII</i> -73N-Fwd                    | 5'- <b>aagctt</b> ggatggtgcttctaagatcagg-3'                                                           | Ligation      |
|                                                       | <i>KpnI</i> -73CΔstop-Rev                  | 5'- <b>ggtacct</b> catgtggaatggaagg-3'                                                                |               |
| SIIN-aLANA                                            | <i>73-KpnI-TAA-BamHI</i> -Fwd              | 5'-ccatttcacatga <b>aggtacc</b> taaccgg <b>ggatcc</b> accggatctagataa-3'                              | Recombination |
|                                                       | <i>73-KpnI-TAA-BamHI</i> -Rev              | 5'-ttaatctagatccggt <b>ggatcc</b> cccggt <b>aggtacct</b> catgtggaatg-3'                               |               |
|                                                       | <i>H-SIIN-H-73FL</i> -Fwd                  | 5'-tcagatctcgagct <b>aaagctt</b> ggccgggagcataattaatttcga<br>aaagctgga <b>agctt</b> ggatggtgctctaa-3' |               |
|                                                       | <i>H-SIIN-H-73FL</i> -Rev                  | 5'-ttagaagcaccat <b>caagctt</b> cagcttttcgaaattaattatgctccc<br>ggcca <b>agctt</b> gagctcgagatctga-3'  |               |
| ΔCR-SIIN                                              | <i>HindIII</i> -73N-Fwd                    | 5'- <b>aagctt</b> ggatggtgcttctaagatcagg-3'                                                           | Ligation      |
|                                                       | <i>PstI</i> -73N-Rev                       | 5'- <b>ctgcag</b> ctccgcttccgcttctct-3'                                                               |               |
|                                                       | <i>PstI</i> -73C-Fwd                       | 5'- <b>ctgcag</b> gataaaaaacccttccatg-3'                                                              |               |
| ΔGPE-SIIN                                             | <i>KpnI</i> -73CΔstop-Rev                  | 5'- <b>ggtacct</b> catgtggaatggaagg-3'                                                                | Ligation      |
|                                                       | <i>HindIII</i> -73N-Fwd                    | 5'- <b>aagctt</b> ggatggtgcttctaagatcagg-3'                                                           |               |
|                                                       | <i>PstI</i> -73N-Rev                       | 5'- <b>ctgcag</b> ctccgcttccgcttctct-3'                                                               |               |
|                                                       | <i>73N-PstI-GE1</i> -Fwd                   | 5'-gaaggcggaaagc <b>ggtcag</b> ggattaacagaattgctagg-3'                                                |               |
| ΔGE-SIIN                                              | <i>SIIN-PstI-73C</i> -Rev                  | 5'-tgctggtaccgt <b>gactgcag</b> ctcatgtggaatggaagg-3'                                                 | Recombination |
|                                                       | <i>PstI</i> -73C-Fwd                       | 5'- <b>ctgcag</b> gataaaaaacccttccatg-3'                                                              |               |
|                                                       | <i>KpnI</i> -73CΔstop-Rev                  | 5'- <b>ggtacct</b> catgtggaatggaagg-3'                                                                |               |
| ΔE-SIIN                                               | <i>EGFP-PstI-73N</i> -Fwd                  | 5'-ctcaagctcgaat <b>ctgcag</b> ggatggtgcttctaagatcagg-3'                                              | Recombination |
|                                                       | <i>73C-PstI-GE</i> -GEP-Rev                | 5'-aaagggttttat <b>ctgcag</b> tactttatcatctcag-3'                                                     |               |
|                                                       | <i>EGFP-PstI-73N</i> -Fwd                  | 5'-ctcaagctcgaat <b>ctgcag</b> ggatggtgcttctaagatcagg-3'                                              |               |
|                                                       | <i>GE2-PstI-GE1</i> -Rev                   | 5'-agttataataa <b>accctgcag</b> ctcgtcgcagaatctttac-3'                                                |               |
| ΔGE1-SIIN                                             | <i>PstI</i> -73GE(E)-Fwd                   | 5'- <b>ctgcag</b> gttattataacttctag-3'                                                                | Ligation      |
|                                                       | <i>KpnI</i> -73CΔstop-Rev                  | 5'- <b>ggtacct</b> catgtggaatggaagg-3'                                                                |               |
|                                                       | <i>EGFP-HindIII</i> -73N-Fwd               | 5'-tcagatctcgagct <b>aaagctt</b> ggatggtgcttctaagatcagg-3'                                            |               |
| ΔGE2-SIIN                                             | <i>SIIN-PstI-GE</i> -Rev                   | 5'-tgctggtaccgt <b>gactgcag</b> tactttatcatctcag-3'                                                   | Recombination |
|                                                       | <i>GEP-PstI-E</i> -Fwd                     | 5'-gatgataaaa <b>gactgcag</b> ggtaaagattctgacgacgag-3'                                                |               |
|                                                       | <i>SIIN-KpnI</i> -73C-Rev                  | 5'-gaaattaattatgct <b>ggatcc</b> catgtggaatggaagg-3'                                                  |               |
| ΔE-ΔGE2-SIIN                                          | <i>EGFP-HindIII</i> -73N-Fwd               | 5'-tcagatctcgagct <b>aaagctt</b> ggatggtgcttctaagatcagg-3'                                            | Recombination |
|                                                       | <i>Cterm-PstI-E</i> -Rev                   | 5'-aaagggttttat <b>ctgcag</b> gctagaagtataataa-3'                                                     |               |
|                                                       | <i>PstI</i> -73C-Fwd                       | 5'- <b>ctgcag</b> gataaaaaacccttccatg-3'                                                              |               |
|                                                       | <i>KpnI</i> -73CΔstop-Rev                  | 5'- <b>ggtacct</b> catgtggaatggaagg-3'                                                                |               |
| aLANA-GEm-SIIN                                        | <i>PstI</i> -73C-Fwd                       | 5'- <b>ctgcag</b> gataaaaaacccttccatg-3'                                                              | Ligation      |
|                                                       | <i>KpnI</i> -73CΔstop-Rev                  | 5'- <b>ggtacct</b> catgtggaatggaagg-3'                                                                |               |
|                                                       | <i>EGFP-HindIII</i> -73N-Fwd               | 5'-tcagatctcgagct <b>aaagctt</b> ggatggtgcttctaagatcagg-3'                                            |               |
| T7-EGFP-73Δx                                          | <i>73C-PstI-GE1</i> -Rev                   | 5'-aaagggttttat <b>ctgcag</b> cctgacgagtgtagccacat-3'                                                 | Recombination |
|                                                       | <i>GEm-KpnI</i> -73C-Fwd                   | 5'-gagggtagtgagga <b>aggtacc</b> gataaaaaacccttccatg-3'                                               |               |
| pHT2-aLANA/<br>pHT2-ΔCR/<br>pHT2-ΔGE                  | <i>SIIN-KpnI</i> -73C-Rev                  | 5'-gaaattaattatgct <b>ggatcc</b> catgtggaatggaagg-3'                                                  | Recombination |
|                                                       | <i>NheI</i> -T7- <i>NheI</i> -EGFP-Fwd     | 5'-tgaaccgtcagatcc <b>gctagc</b> cccggttaatacgaactcactataggg <b>gctagc</b><br>ctaccggtcgccac-3'       |               |
| GE-SIIN                                               | <i>NheI</i> -T7- <i>NheI</i> -EGFP-Rev     | 5'-gtggcgaccggt <b>agcctagc</b> ccctatagtgagctgattaccggg <b>gctagc</b><br>gatctgacggttca-3'           | Recombination |
|                                                       | <i>Halo-NheI</i> -EGFP73-Fwd               | 5'-tacgactcactatag <b>gctagc</b> ccggactcagatctcgagctc-3'                                             |               |
| SIIN-GE-SIIN                                          | <i>Halo-NheI</i> -SIIN-Rev                 | 5'-tatccgcccagct <b>gctagc</b> agcttttcgaaattaattat-3'                                                | Recombination |
|                                                       | <i>EGFP-HindIII</i> -GE-Fwd                | 5'-tcagatctcgagct <b>aaagctt</b> ccgattaacagaattgctagg-3'                                             |               |
| pEFIN3-SIIN/<br>pEFIN3-aLANA-SIIN/<br>pEFIN3-ΔGE-SIIN | <i>SIIN-HindIII</i> -GE-Rev                | 5'-cgactcgagaat <b>tcgaagctt</b> gaaagggttttatcttct-3'                                                | Recombination |
|                                                       | <i>BglII</i> -SIIN- <i>BglII</i> -73FL-Fwd | 5'-tacaagtcggact <b>cagatct</b> ccggg<br>agcataaataatttcgaaaagct <b>cagatct</b> cagagctcaagctcc-3'    |               |
| pEFin3-H-2Kb                                          | <i>BglII</i> -SIIN- <i>BglII</i> -73FL-Rev | 5'-ggaagcttgagct <b>cagatct</b> gagcttttcgaaattaat<br>tatgtcccgg <b>agatct</b> gagctccgactgta-3'      | Recombination |
|                                                       | <i>EGFP-pEFIN3-XbaI</i> -Fwd               | 5'-ccggggtatc <b>ctagat</b> ggtgagcaaggcgag-3'                                                        |               |
|                                                       | <i>SIIN-pEFIN3-XbaI</i> -Rev               | 5'-actagtcgact <b>ctagat</b> tagagcttttcgaaattaatt-3'                                                 |               |
|                                                       | <i>pEFINKb-XbaI</i> -Fwd                   | 5'-ccggggtatc <b>ctagat</b> ggtgagcaaggcgag-3'                                                        | Recombination |
|                                                       | <i>pEFINKb-XbaI</i> -Rev                   | 5'-actagtcgact <b>ctagat</b> cagctagagaatgagg-3'                                                      |               |
