# Supplementary material for: Macavirus latency-associated protein evades immune detection through regulation of protein synthesis in cis depending upon its glycin/glutamate-rich domain
Source: PubMed Central journal article supplement (PMC5695634; doi:10.1371/journal.ppat.1006691), 2017-10-23
Supplement: ppat.1006691.s009.pdf [file ppat.1006691.s009.pdf]

**S2 Table.** Oligonucleotides used in this study to perform quantitative PCR reactions

| <b>Primer</b>          | <b>Sequence</b>                |
|------------------------|--------------------------------|
| <b>ORF73-S</b>         | 5'-ggactagaccctctttatgacc-3'   |
| <b>ORF73-R</b>         | 5'-gcaatgggtcctatcttctgctcg-3' |
| <b>OryBos-HPRT-Fwd</b> | 5'-ggtggagatgatctctcaac-3'     |
| <b>OryBos-HPRT-Rev</b> | 5'-caacaaactgtctggaatttc-3'    |
