# Supplementary material for: Macavirus latency-associated protein evades immune detection through regulation of protein synthesis in cis depending upon its glycin/glutamate-rich domain
Source: PubMed Central journal article supplement (PMC5695634; doi:10.1371/journal.ppat.1006691), 2017-10-23
Supplement: ppat.1006691.s010.pdf [file ppat.1006691.s010.pdf]

**S3 Table.** Oligonucleotides used in this study to produce BAC recombinant expression plasmids.

| Primer         | Sequence                                                                                                       |
|----------------|----------------------------------------------------------------------------------------------------------------|
| H1ΔCR-galK-Fwd | 5'-gcgggaagaaaaaaaaaagaaacgaccgtaacaggagaaggcggagcggacctgttgacaattaatcatcggca-3'                               |
| H2ΔCR-galK-Rev | 5'- taaagcctgatacccctgggcttcgtggacatggaagggtttttatctcagcactgtcctgctcctt-3'                                     |
| H1ΔGE-galK-Fwd | 5'-gggaccccagggaatcagagggaaactgaagatgatataaaagtactgcagcctgttgacaattaatcatcggca -3'                             |
| H1H2-ΔGE-Fwd   | 5'-gggaccccagggaatcagagggaaactgaagatgatataaaagtactgcagga<br>taaaaaaccctttccatgtccacgaagccaggggtatcaggctttt -3' |
| H1H2-ΔGE-Rev   | 5'- aaaagcctgatacccctgggcttcgtggacatggaagggtttttatcct<br>gcagfcttttatatcatctcagttccctctgattcctcgggtccc-3'      |
